# Supplementary material for: Quasi-solid-state quantum dot sensitized solar cells with power conversion efficiency over 9% and high stability
Source: Royal Society of Chemistry journal article supplement (doi:10.1039/c6ta05894a), 2016-01-01
Supplement: c6ta05894a1.pdf [file c6ta05894a1.pdf]

## Electronic Supplementary Information (ESI)

### **Quasi-solid-state quantum dot sensitized solar cells with power conversion efficiency over 9% and high stability**

Wenliang Feng, Leilei Zhao, Jun Du, Yan Li\* and Xinhua Zhong\*

#### **Preparation of Zn-Cu-In-Se QDs**

The oil-soluble Zn-Cu-In-Se (ZCISE) QDs were synthesized according to our previous method.<sup>1</sup> First, a DPP-Se precursor was prepared by dissolving Se powder (0.024 g, 0.3 mmol) into 0.8 mL of DPP and OAm (v/v, 3:5) at room temperature to form a bright yellow solution. And a Zn(OAc)<sub>2</sub> stock solution was prepared by dissolving Zn(OAc)<sub>2</sub> (0.011 g, 0.04 mmol) into 5 mL of OAm and ODE (v/v, 1: 4) at 120 °C. In the typical synthetic process, a mixture of CuI (19.0 mg, 0.1 mmol), In(OAc)<sub>3</sub> (29.0 mg, 0.1 mmol), OAm (2.0 mL), ODE (1.5 mL) and 0.4 mL of the above Zn(OAc)<sub>2</sub> stock solution were loaded in a 50 mL three necked flask. Under the protection of N<sub>2</sub>, the mixture was heated to 200 °C followed by injecting 0.8 mL of the above DPP-Se precursor into the reaction system under stirring. The reaction was proceeded 5 min before cooled to 90 °C. The initial OAm-capped ZCISE QDs were purified by centrifugation and decantation with the addition of excessive ethanol and acetone. The purified oil-soluble ZCISE QD precipitate was redissolved in 10 mL of dichloromethane. The water-soluble MPA capped ZCISE QDs was prepared using similar method by replacing TGA with MPA.<sup>1,2</sup>

#### **Preparation of the Zn-Cu-In-Se sensitized photoanodes**

The ZCISE sensitized photoanodes were obtained by dropping 45 μL of MPA-capped ZCISE QD aqueous dispersion onto the TiO<sub>2</sub> mesoporous film and standing for 2 h. The obtained photoanodes was then passivated by 6 ZnS layers (0.1 M Zn(OAc)<sub>2</sub> methanol solution and 0.1 M Na<sub>2</sub>S aqueous solution for 1 min/dip).

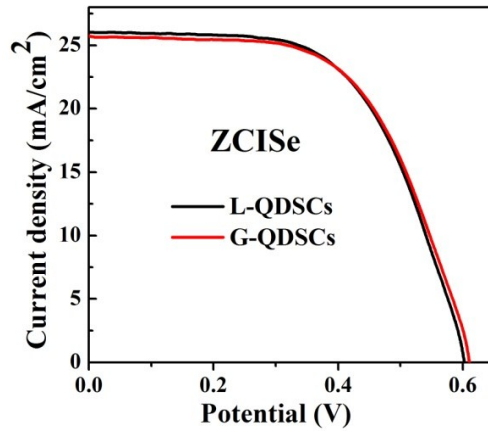

**Fig. S1**  $J$ - $V$  curves of ZCISE sensitized solar cells based on liquid and gel electrolytes.

**Table S1** Photovoltaic parameters of ZCISE sensitized solar cells based on liquid and gel electrolytes.

| Cells   | $J_{sc}$ ( $\text{mA}\cdot\text{cm}^{-2}$ ) | $V_{oc}$ (V) | FF (%)       | PCE (%)               |
|---------|---------------------------------------------|--------------|--------------|-----------------------|
| L-QDSCs | 26.01(26.10)                                | 0.601(0.602) | 58.37(58.24) | 9.12 $\pm$ 0.02(9.15) |
| G-QDSCs | 25.59(25.67)                                | 0.609(0.611) | 58.75(58.59) | 9.16 $\pm$ 0.04(9.19) |

<sup>a</sup> Average parameters and standard deviation based on 5 solar cells in parallel. The numbers in parentheses represent the values obtained for the champion cells.

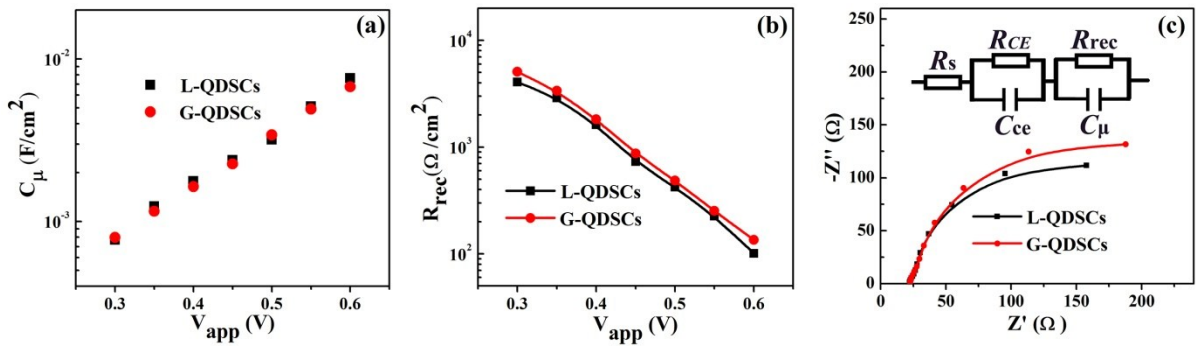

**Fig. S2** EIS of ZCISE sensitized L-QDSCs and G-QDSCs: (a) chemical capacitance  $C_{\mu}$ ; (b) recombination resistance  $R_{rec}$ ; (c) Nyquist plots at  $-0.60$  V forward bias.

**Table S2** Simulated values of resistance (R) and capacitance (C) under the forward bias of  $-0.60$  V of ZCISE sensitized L-QDSCs and G-QDSCs.

| The Cells | $R_s$ ( $\Omega \cdot \text{cm}^2$ ) | $R_{\text{CE}}$ ( $\Omega \cdot \text{cm}^2$ ) | $R_{\text{rec}}$ ( $\Omega \cdot \text{cm}^2$ ) | $C_{\mu}$ ( $\text{mF} \cdot \text{cm}^2$ ) |
|-----------|--------------------------------------|------------------------------------------------|-------------------------------------------------|---------------------------------------------|
| L-QDSCs   | 22.23                                | 4.72                                           | 225.9                                           | 5.1                                         |
| G-QDSCs   | 22.62                                | 5.15                                           | 267.6                                           | 4.9                                         |

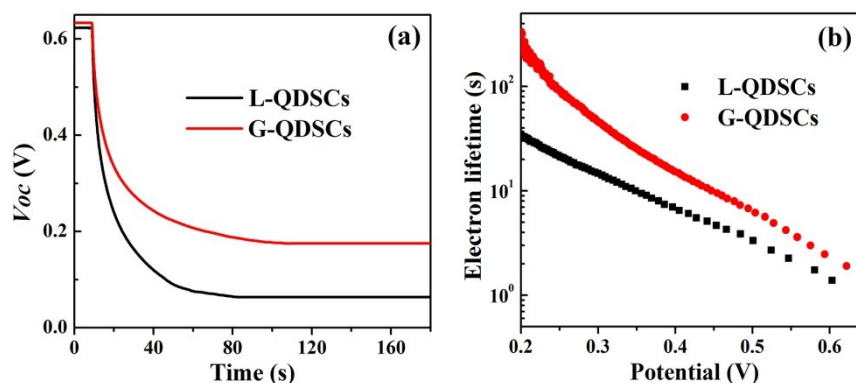

**Fig. S3** Open circuit voltage decay (OCVD) measurements of ZCISE sensitized L-QDSCs and G-QDSCs: (a) the  $V_{oc}$  decay curves. (b) the electron life time extracted from OCVD.

## References

- 1 J. Du, Z. Du, J.-S. Hu, Z. Pan, Q. Shen, J. Sun, D. Long, H. Dong, L. Sun, X. Zhong and L.-J. Wan, *J. Am. Chem. Soc.* 2016, **138**, 4201–4209.
- 2 W. Li and X. Zhong, *J. Phys. Chem. Lett.*, 2015, **6**, 796–806.
